# Supplementary material
Source: publisher figshare collection journal article supplement (https://acs.figshare.com/ndownloader/files/33226595)
Supplement: Supplementary file 1 [file 33226595]

## **Supporting Information**

### **Optimizing leaching parameters and studying kinetics of copper recovering from waste printed circuit boards**

Juanjuan Hao<sup>1</sup>, Xiaolu Wang<sup>1</sup>, Yishu Wang<sup>1</sup>, Yufeng Wu<sup>1</sup>, Fu Guo<sup>1, 2, \*</sup>

1. --- Faculty of Materials and Manufacturing, Beijing University of Technology, Beijing 100124, P. R. China

2. --- Key Laboratory of Advanced Functional Materials, Ministry of Education, Beijing 100124, P. R. China

\* Corresponding author Email: [guofu@bjut.edu.cn](mailto:guofu@bjut.edu.cn)

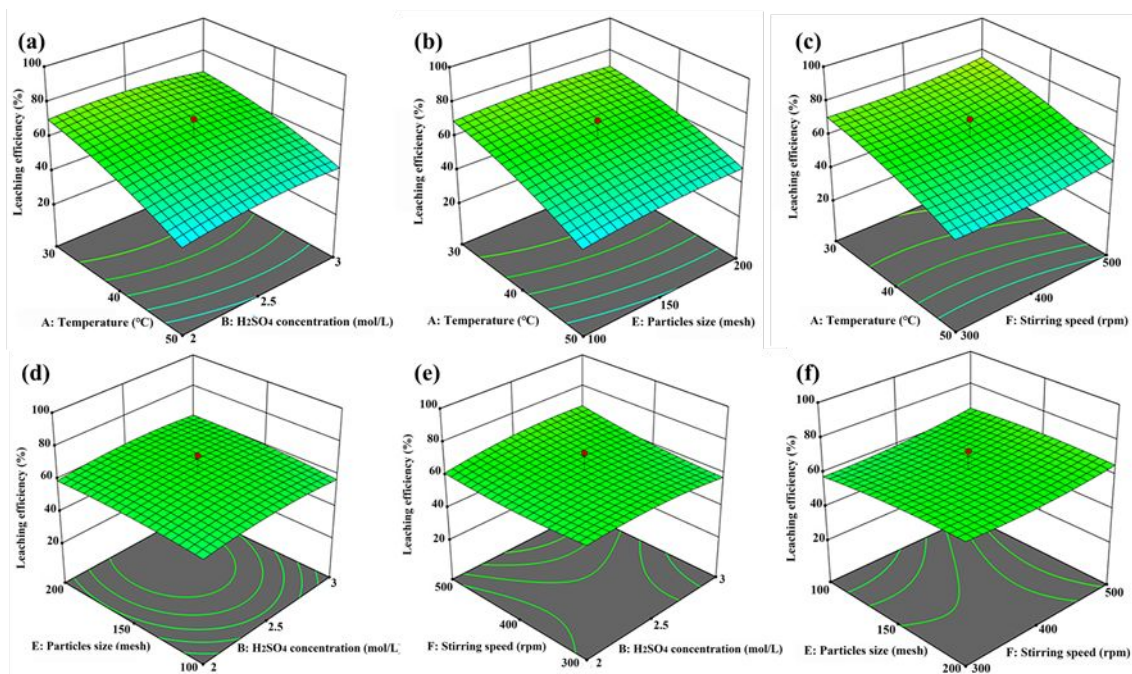

Figure S1. Response surface plots reflecting the simultaneous effects of dual parameters on the leaching efficiency of copper. (a) temperature and  $[\text{H}_2\text{SO}_4]$ , (b) temperature and particles size, (c) temperature and stirring speed, (d)  $[\text{H}_2\text{SO}_4]$  and particles size, (e)  $[\text{H}_2\text{SO}_4]$  and stirring speed, and (f) particles size and stirring speed.

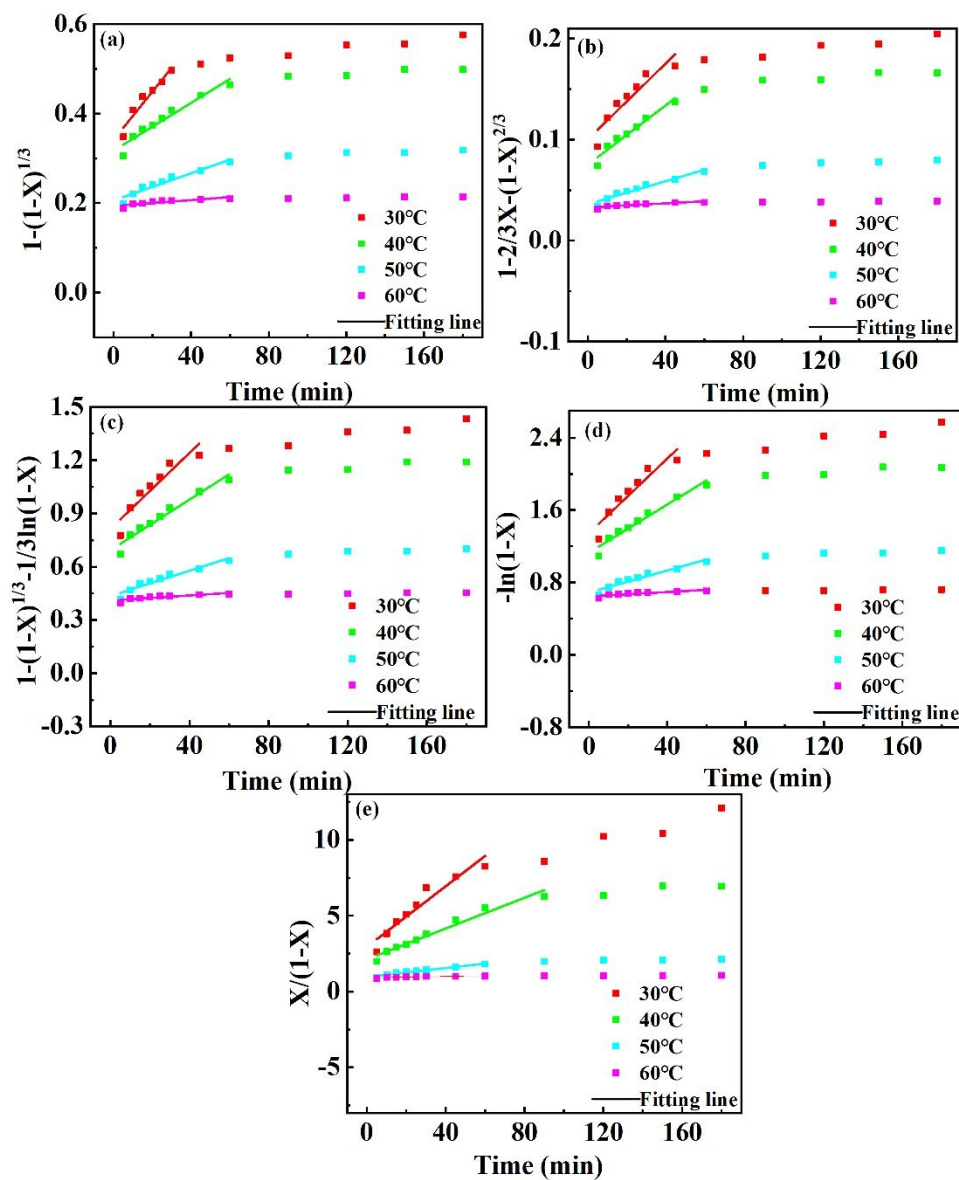

Figure S2. The relationship (a) between  $1-(1-X)^{1/3}$  and t, (b) between  $1-2/3X-(1-X)^{2/3}$  and t, (c) between  $1-(1-X)^{1/3}-1/3\ln(1-X)$  and t, (d) between  $-\ln(1-X)$  and t, and (e) between  $X/(1-X)$  and t.

Table S1. Fitting results of kinetic equations.

| T/K | Chemical control reaction |                       | Diffusion control reaction |                        | Mixed control reaction      |                       |
|-----|---------------------------|-----------------------|----------------------------|------------------------|-----------------------------|-----------------------|
|     | $1-(1-X)^{1/3}=k_1t$      |                       | $1-2/3X-(1-X)^{2/3}=k_2t$  |                        | $1-(1-X)^{1/3}-1/3\ln(1-X)$ |                       |
|     | R <sup>2</sup>            | k                     | R <sup>2</sup>             | k/10 <sup>3</sup>      | R <sup>2</sup>              | k                     |
| 303 | 0.933                     | 0.0054                | 0.862                      | 0.00187                | 0.872                       | 0.011                 |
| 313 | 0.94                      | 0.0027                | 0.951                      | 0.00146                | 0.952                       | 0.00711               |
| 323 | 0.926                     | 0.0015                | 0.946                      | 5.68*10 <sup>-4</sup>  | 0.932                       | 0.00355               |
| 333 | 0.726                     | 3.26*10 <sup>-4</sup> | 0.737                      | 1.046*10 <sup>-4</sup> | 0.728                       | 7.34*10 <sup>-4</sup> |
| T/K | First order pseudo        |                       | Second order pseudo        |                        |                             |                       |
|     | $-\ln(1-X)$               |                       | $X/(1-X)$                  |                        |                             |                       |
|     | R <sup>2</sup>            | k                     | R <sup>2</sup>             | k                      |                             |                       |
| 303 | 0.881                     | 0.021                 | 0.90                       | 0.0999                 |                             |                       |
| 313 | 0.958                     | 0.0133                | 0.957                      | 0.051                  |                             |                       |
| 328 | 0.936                     | 0.0061                | 0.95                       | 0.01449                |                             |                       |
| 333 | 0.73                      | 0.00122               | 0.74                       | 0.0024                 |                             |                       |
